# Supplementary material
Source: ML conference proceedings conference paper supplement (https://openreview.net/forum?id=B59jV8cAQq)
Supplement: supplementary_material [file attachment]

## A Identifiability of latents drawn from a vMF around cluster vectors

In this section, we formally state and prove our core theoretical result. We start off by defining and discussing a useful notion, then introduce our assumptions on the data generating process. We proceed with the main statement and finish with the proof.

### A.1 Affine Generator Systems

**Definition 1** (Affine Generator System). *A system of vectors  $\{\mathbf{v}_c \in \mathbb{R}^d | c \in \mathcal{C}\}$  is called an affine generator system if the affine hull defined by them is  $\mathbb{R}^d$ . More precisely, any vector in  $\mathbb{R}^d$  is an affine linear combination of the vectors in the system. Put into symbols: for any  $\mathbf{v} \in \mathbb{R}^d$  there exist coefficients  $\alpha_c \in \mathbb{R}$ , such that*

$$\mathbf{v} = \sum_{c \in \mathcal{C}} \alpha_c \mathbf{v}_c \quad \text{and} \quad \sum_{c \in \mathcal{C}} \alpha_c = 1. \quad (3)$$

**Lemma 1** (Properties of affine generator systems). *The following hold for any affine generator system  $\{\mathbf{v}_c \in \mathbb{R}^d | c \in \mathcal{C}\}$ :*

1. *for any  $a \in \mathcal{C}$  the system  $\{\mathbf{v}_c - \mathbf{v}_a | c \in \mathcal{C}\}$  is now a generator system of  $\mathbb{R}^d$ ;*
2. *the invertible linear image of an affine generator system is also an affine generator system.*

### A.2 Assumptions and main result

**Assumptions 1C** (DGP with vMF samples around cluster vectors). *Assume the following DGP:*

- (i) *There exists a finite set of classes  $\mathcal{C}$ , represented by a set of unit-norm  $d$ -dimensional cluster-vectors  $\{\mathbf{v}_c | c \in \mathcal{C}\} \subseteq \mathbb{S}^{d-1}$  such that they form an affine generator system of  $\mathbb{R}^d$ .*
- (ii) *There is a finite set of instace labels  $\mathcal{I}$  and a well-defined, surjective class function  $\mathcal{C} : \mathcal{I} \rightarrow \mathcal{C}$  (every label belongs to exactly one class and every class is in use).*
- (iii) *Our data sample is labelled with an instance label chosen uniformly, i.e.,  $I \in \text{Uni}(\mathcal{I})$  and, hence, belongs to class  $C = \mathcal{C}(I)$ .*
- (iv) *The latent  $\mathbf{z} \in \mathbb{S}^{d-1}$  of our data sample with label  $I$  is drawn from a vMF distribution around the cluster vector  $\mathbf{v}_C$ , where  $C = \mathcal{C}(I)$ :*

$$\mathbf{z} \sim p(\mathbf{z}|C) \propto e^{\alpha \langle \mathbf{v}_C, \mathbf{z} \rangle}. \quad (4)$$

- (v) *The data sample  $\mathbf{x}$  is generated by passing the latent  $\mathbf{z}$  through a continuous and injective generator function  $\mathbf{g} : \mathbb{S}^{d-1} \rightarrow \mathbb{R}^D$ , i.e.,  $\mathbf{x} = \mathbf{g}(\mathbf{z})$ .*

Assume that, using the DIET objective (6), we train a continuous encoder  $\mathbf{f} : \mathbb{R}^D \rightarrow \mathbb{R}^d$  on  $\mathbf{x}$  and a linear classification head  $\mathbf{W}$  on top of  $\mathbf{f}$ . The rows of  $\mathbf{W}$  are  $\{\mathbf{w}_i^\top | i \in \mathcal{I}\}$ . In other words,  $\mathbf{W}$  computes similarities (scalar products) between its rows and the embeddings:

$$\mathbf{W} : \mathbf{f}(\mathbf{x}) \mapsto [\langle \mathbf{w}_i, \mathbf{f}(\mathbf{x}) \rangle | i \in \mathcal{I}]. \quad (5)$$

In DIET, we optimize the following objective amongst all possible continuous encoders  $\mathbf{f}$ , linear classifiers  $\mathbf{W}$ , and  $\beta > 0$ :

$$\mathcal{L}(\mathbf{f}, \mathbf{W}, \beta) = \mathbb{E}_{(\mathbf{x}, I)} \left[ -\ln \frac{e^{\beta \langle \mathbf{w}_I, \mathbf{f}(\mathbf{x}) \rangle}}{\sum_{j \in \mathcal{I}} e^{\beta \langle \mathbf{w}_j, \mathbf{f}(\mathbf{x}) \rangle}} \right] \quad (6)$$

**Theorem 1C** (Identifiability of latents drawn from a vMF around cluster vectors). *Let  $(\mathbf{f}, \mathbf{W}, \beta)$  globally minimize the DIET objective (6) under the following additional constraints:*

- C1. *both the embeddings  $\mathbf{f}(\mathbf{x})$  and  $\mathbf{w}_i$ 's are unit-normalized. Then:*
  - (a)  $\mathbf{h} = \mathbf{f} \circ \mathbf{g}$  *is orthogonal linear, i.e., the latents are identified up to an orthogonal linear transformation;*
  - (b)  $\mathbf{w}_i = \mathbf{h}(\mathbf{v}_{\mathcal{C}(i)})$  *for any  $i \in \mathcal{I}$ , i.e.,  $\mathbf{w}_i$ 's identify the cluster-vectors  $\mathbf{v}_c$  up to the same orthogonal linear transformation;*
  - (c)  $\beta = \alpha$ , *the temperature of the vMF distribution is also identified.*
- C2. *the embeddings  $\mathbf{f}(\mathbf{x})$  are unit-normalized, the  $\mathbf{w}_i$ 's are unnormalized. Then:*
  - (a)  $\mathbf{h} = \mathbf{f} \circ \mathbf{g}$  *is orthogonal linear;*
  - (b)  $\mathbf{w}_i = \frac{\alpha}{\beta} \mathbf{h}(\mathbf{v}_{\mathcal{C}(i)}) + \psi$  *for any  $i \in \mathcal{I}$ , where  $\psi$  is a constant vector independent of  $i$ .*

279 C3. the embeddings  $\mathbf{f}(\mathbf{x})$  are unnormalized, while the  $\mathbf{w}_i$ 's are unit-normalized. If the system  
 280  $\{\mathbf{v}_c|c\}$  is **diverse enough in the sense of Assum. 2**, then:

281 (a)  $\mathbf{w}_i = \mathcal{O}\mathbf{v}_{\mathcal{C}(i)}$ , for any  $i \in \mathcal{I}$ , where  $\mathcal{O}$  is orthogonal linear;

282 (b)  $\mathbf{h} = \mathbf{f} \circ \mathbf{g} = \frac{\alpha}{\beta}\mathcal{O}$  with the same orthogonal linear transformation, but scaled with  $\frac{\alpha}{\beta}$ .

283 C4. neither the embeddings  $\mathbf{f}(\mathbf{x})$  nor the rows of  $\mathbf{W}$  are unit-normalized. Then:

284 (a)  $\mathbf{h} = \mathbf{f} \circ \mathbf{g}$  is linear;

285 (b)  $\mathbf{w}_i$  identifies  $\mathbf{v}_{\mathcal{C}(i)}$  up to an affine linear transformation.

286 Furthermore, in all cases, the row vectors that belong to samples of the same class are equal, i.e., for  
 287 any  $i, j \in \mathcal{I}$ ,  $\mathcal{C}(i) = \mathcal{C}(j)$  implies  $\mathbf{w}_i = \mathbf{w}_j$ .

288 **Remark.** In cases C2 and C4, the cluster vectors are unnormalized and, therefore, can absorb the  
 289 temperature parameter  $\beta$ . Thus  $\beta$  can be set to 1 without loss of generality. In case C3, it is  $\mathbf{f}$  that  
 290 can absorb  $\beta$ .

291 **Assumption 2** (Diverse data). The system  $\{\mathbf{v}_c|c \in \mathcal{C}\}$  is said to be diverse enough, if the following  
 292  $|\mathcal{C}| \times 2d$  matrix has full column rank of  $2d$ :

$$\begin{pmatrix} \dots\dots\dots & \dots\dots\dots \\ (\mathbf{v}_c \odot \mathbf{v}_c)^\top & \mathbf{v}_c^\top \\ \dots\dots\dots & \dots\dots\dots \end{pmatrix}, \quad (7)$$

293 where  $[\mathbf{x} \odot \mathbf{y}]_i = x_i y_i$  is the elementwise- or Hadamard product.

294 As long as  $|\mathcal{C}| \geq 2d$ , this property holds almost surely w.r.t. the Lebesgue-measure of  $\mathbb{S}^{d-1}$  or any  
 295 continuous probability distribution of  $\mathbf{v}_c \in \mathbb{S}^{d-1}$ .

296 **Proof. Step 1: Deriving an equation characterizing the global optimizers of the objective.**

297 **Rewriting the objective in terms of latents:** we plug the expression  $\mathbf{x} = \mathbf{g}(\mathbf{z})$  into the optimization  
 298 objective (6) to express the dependence in terms of the latents  $\mathbf{z}$ :

$$\mathcal{L}(\mathbf{f}, \mathbf{W}, \beta) = \mathbb{E}_{(\mathbf{z}, I)} \left[ -\ln \frac{e^{\beta \langle \mathbf{w}_I, \mathbf{f} \circ \mathbf{g}(\mathbf{z}) \rangle}}{\sum_{j \in \mathcal{I}} e^{\beta \langle \mathbf{w}_j, \mathbf{f} \circ \mathbf{g}(\mathbf{z}) \rangle}} \right] = \mathcal{L}_{\mathbf{z}}(\mathbf{f} \circ \mathbf{g}, \mathbf{W}, \beta), \quad (8)$$

299 where the optimization is still over  $\mathbf{f}$  (and not  $\mathbf{h} = \mathbf{f} \circ \mathbf{g}$ ).

300 We note that the generator  $\mathbf{g}$  is, by assumption, continuously invertible on the compact set  $\mathbb{S}^{d-1}$ .  
 301 Therefore, its image  $\mathbf{g}(\mathbb{S}^{d-1})$  is compact, too, and its inverse  $\mathbf{g}^{-1}$  is also continuous. By Tietze's  
 302 extension theorem [Wikipedia, 2024b],  $\mathbf{g}^{-1}$  can be continuously extended to a function  $\mathbf{F} : \mathbb{R}^D \rightarrow$   
 303  $\mathbb{S}^{d-1}$ . Therefore, any continuous function  $\mathbf{h} : \mathbb{S}^{d-1} \rightarrow \mathbb{R}^d$  can take the role of  $\mathbf{f} \circ \mathbf{g}$  by substituting  
 304  $\mathbf{f} = \mathbf{h} \circ \mathbf{F}$  continuous, since now  $\mathbf{f} \circ \mathbf{g} = \mathbf{h} \circ (\mathbf{F} \circ \mathbf{g}) = \mathbf{h} \circ id_{\mathbb{S}^{d-1}} = \mathbf{h}$ .

305 Hence, minimizing  $\mathcal{L}_{\mathbf{z}}(\mathbf{f} \circ \mathbf{g}, \mathbf{W}, \beta)$  (and by extension  $\mathcal{L}(\mathbf{f}, \mathbf{W}, \beta)$ ) for continuous  $\mathbf{f}$  equates to  
 306 minimizing  $\mathcal{L}_{\mathbf{z}}(\mathbf{h}, \mathbf{W}, \beta)$  for continuous  $\mathbf{h}$ :

$$\mathcal{L}_{\mathbf{z}}(\mathbf{h}, \mathbf{W}, \beta) = \mathbb{E}_{(\mathbf{z}, I)} \left[ -\ln \frac{e^{\beta \langle \mathbf{w}_I, \mathbf{h}(\mathbf{z}) \rangle}}{\sum_{j \in \mathcal{I}} e^{\beta \langle \mathbf{w}_j, \mathbf{h}(\mathbf{z}) \rangle}} \right]. \quad (9)$$

307 **Expressing the condition for global optimality of the objective:** We rewrite the objective (9) by  
 308 1) using the indicator variable  $\delta_{I=i}$  of the event  $\{I = i\}$  and 2) applying the law of total expectation:

$$\mathcal{L}_{\mathbf{z}}(\mathbf{h}, \mathbf{W}, \beta) = \mathbb{E}_{(\mathbf{z}, I)} \left[ -\sum_{i \in \mathcal{I}} \delta_{I=i} \ln \frac{e^{\beta \langle \mathbf{w}_i, \mathbf{h}(\mathbf{z}) \rangle}}{\sum_{j \in \mathcal{I}} e^{\beta \langle \mathbf{w}_j, \mathbf{h}(\mathbf{z}) \rangle}} \right] \quad (10)$$

$$= \mathbb{E}_{\mathbf{z}} \left[ \mathbb{E}_I \left[ -\sum_{i \in \mathcal{I}} \delta_{I=i} \ln \frac{e^{\beta \langle \mathbf{w}_i, \mathbf{h}(\mathbf{z}) \rangle}}{\sum_{j \in \mathcal{I}} e^{\beta \langle \mathbf{w}_j, \mathbf{h}(\mathbf{z}) \rangle}} \mid \mathbf{z} \right] \right]. \quad (11)$$

309 Using the properties that  $\mathbb{E}[A f(B)|B] = \mathbb{E}[A|B]f(B)$  and that  $\mathbb{E}[\delta_{I=i}] = \mathbb{P}(I = i)$ , we conclude  
 310 that:

$$\mathcal{L}_{\mathbf{z}}(\mathbf{h}, \mathbf{W}, \beta) = \mathbb{E}_{\mathbf{z}} \left[ - \sum_{i \in \mathcal{I}} \mathbb{E}_I \left[ \delta_{I=i} \ln \frac{e^{\beta \langle \mathbf{w}_i, \mathbf{h}(\mathbf{z}) \rangle}}{\sum_{j \in \mathcal{I}} e^{\beta \langle \mathbf{w}_j, \mathbf{h}(\mathbf{z}) \rangle}} \mid \mathbf{z} \right] \right] \quad (12)$$

$$= \mathbb{E}_{\mathbf{z}} \left[ - \sum_{i \in \mathcal{I}} \mathbb{E}_I [\delta_{I=i}] \ln \frac{e^{\beta \langle \mathbf{w}_i, \mathbf{h}(\mathbf{z}) \rangle}}{\sum_{j \in \mathcal{I}} e^{\beta \langle \mathbf{w}_j, \mathbf{h}(\mathbf{z}) \rangle}} \right] \quad (13)$$

$$= \mathbb{E}_{\mathbf{z}} \left[ - \sum_{i \in \mathcal{I}} \mathbb{P}(I = i | \mathbf{z}) \ln \frac{e^{\beta \langle \mathbf{w}_i, \mathbf{h}(\mathbf{z}) \rangle}}{\sum_{j \in \mathcal{I}} e^{\beta \langle \mathbf{w}_j, \mathbf{h}(\mathbf{z}) \rangle}} \right]. \quad (14)$$

311 By Gibbs' inequality [Wikipedia, 2024a], the cross-entropy inside the expectation is globally mini-  
 312 mized if and only if

$$\frac{e^{\beta \langle \mathbf{w}_i, \mathbf{h}(\mathbf{z}) \rangle}}{\sum_{j \in \mathcal{I}} e^{\beta \langle \mathbf{w}_j, \mathbf{h}(\mathbf{z}) \rangle}} = \mathbb{P}(I = i | \mathbf{z}), \quad \text{for any } i \in \mathcal{I}. \quad (15)$$

313 Moreover, the entire expectation is globally minimized if and only if the above equality (15) holds  
 314 almost everywhere for  $\mathbf{z} \in \mathbb{S}^{d-1}$ .

315 Using that instance label  $I$  is uniformly distributed, or  $\mathbb{P}(I = j) = \mathbb{P}(I = i)$ , the likelihood of the  
 316 sample being in class  $i$  can be expressed via Bayes' theorem as:

$$\mathbb{P}(I = i | \mathbf{z}) = \frac{p(\mathbf{z} | I = i) \mathbb{P}(I = i)}{\sum_{j \in \mathcal{I}} p(\mathbf{z} | I = j) \mathbb{P}(I = j)} = \frac{p(\mathbf{z} | I = i)}{\sum_{j \in \mathcal{I}} p(\mathbf{z} | I = j)}. \quad (16)$$

317 Substituting (16) into (15) yields that for any  $i \in \mathcal{I}$  and almost everywhere w.r.t.  $\mathbf{z} \in \mathbb{S}^{d-1}$ :

$$\frac{e^{\beta \langle \mathbf{w}_i, \mathbf{h}(\mathbf{z}) \rangle}}{\sum_{j \in \mathcal{I}} e^{\beta \langle \mathbf{w}_j, \mathbf{h}(\mathbf{z}) \rangle}} = \frac{p(\mathbf{z} | I = i)}{\sum_{j \in \mathcal{I}} p(\mathbf{z} | I = j)}. \quad (17)$$

318 We now divide the equation (17) for the probability of a sample having label  $i$  with that of having  
 319 label  $k$  and take the logarithm. This yields that  $\mathcal{L}_{\mathbf{z}}(\mathbf{h}, \mathbf{W}, \beta)$  is globally minimized if and only if

$$\beta \langle \mathbf{w}_i - \mathbf{w}_k, \mathbf{h}(\mathbf{z}) \rangle = \ln \frac{p(\mathbf{z} | I = i)}{p(\mathbf{z} | I = k)} \quad (18)$$

320 holds for any  $i, k \in \mathcal{I}$  and almost everywhere w.r.t.  $\mathbf{z} \in \mathbb{S}^{d-1}$ .

321 **Plugging in the vMF distribution:** Plugging the assumed conditional distribution from (4) into  
 322 (18) yields the equivalent expression:

$$\beta \langle \mathbf{w}_i - \mathbf{w}_k, \mathbf{h}(\mathbf{z}) \rangle = \alpha \langle \mathbf{v}_{C(i)} - \mathbf{v}_{C(k)}, \mathbf{z} \rangle \quad (19)$$

323 holds for any  $i, k \in \mathcal{I}$  and almost everywhere w.r.t.  $\mathbf{z} \in \mathbb{S}^{d-1}$ . Since  $\mathbf{h}$  is continuous, the equation  
 324 holds almost everywhere w.r.t.  $\mathbf{z}$  if and only if it holds for all  $\mathbf{z} \in \mathbb{S}^{d-1}$ .

325 Observe that if  $\mathbf{h} = id|_{\mathbb{S}^{d-1}}$ ,  $\mathbf{w}_i = \mathbf{v}_{C(i)}$  for any  $i \in \mathcal{I}$ , and  $\beta = \alpha$ , then the equation is satisfied.  
 326 Thus, we can conclude that the global minimum of the cross-entropy loss is achieved.

327 **Step 2: Solving the equation for  $\mathbf{h}$ ,  $\mathbf{W}$  and proving identifiability.**

328 We now find all solutions to prove the identifiability of the latent variables and that of the cluster  
 329 vectors. Denote  $\tilde{\mathbf{w}}_i = \frac{\beta}{\alpha} \mathbf{w}_i$  to simplify the above equation to:

$$\langle \tilde{\mathbf{w}}_i - \tilde{\mathbf{w}}_k, \mathbf{h}(\mathbf{z}) \rangle = \langle \mathbf{v}_{C(i)} - \mathbf{v}_{C(k)}, \mathbf{z} \rangle. \quad (20)$$

330  **$\mathbf{h}$  is injective and has full-dimensional image:** We prove that  $\mathbf{h}$  is injective. Assume that  
 331  $\mathbf{h}(\mathbf{z}_1) = \mathbf{h}(\mathbf{z}_2)$  for some  $\mathbf{z}_1, \mathbf{z}_2 \in \mathbb{S}^{d-1}$ . Plugging  $\mathbf{z}_1$  and  $\mathbf{z}_2$  into (20) and subtracting the two  
 332 equations yields:

$$0 = \langle \tilde{\mathbf{w}}_i - \tilde{\mathbf{w}}_k, \mathbf{h}(\mathbf{z}_1) - \mathbf{h}(\mathbf{z}_2) \rangle = \langle \mathbf{v}_{C(i)} - \mathbf{v}_{C(k)}, \mathbf{z}_1 - \mathbf{z}_2 \rangle, \quad (21)$$

333 for any  $i, k$ . However, as the cluster vectors  $\{\mathbf{v}_c | c\}$  form an affine generator system, the vectors  
 334  $\{\mathbf{v}_{C(i)} - \mathbf{v}_{C(k)} | i, k\}$  form a generator system of  $\mathbb{R}^d$  (see Lem. 1). Therefore,  $\langle \mathbf{y}, \mathbf{z}_1 - \mathbf{z}_2 \rangle = 0$ , for  
 335 any  $\mathbf{y} \in \mathbb{R}^d$ , which holds if and only if  $\mathbf{z}_1 = \mathbf{z}_2$ . Hence,  $\mathbf{h}$  is injective.

336 By the Borsuk-Ulam theorem, for any continuous map from  $\mathbb{S}^{d-1}$  to a space of dimensionality at  
 337 most  $d - 1$  there exists some pair of antipodal points that are mapped to the same point. Consequently,  
 338 no such function can be injective at the same time. Since  $\mathbf{h} : \mathbb{S}^{d-1} \rightarrow \mathbb{R}^d$  is injective, the linear span  
 339 of its image must be  $\mathbb{R}^d$ .

340 **Collapse of  $w_i$ 's:** We prove that  $\tilde{w}_i = \tilde{w}_k$  if  $\mathcal{C}(i) = \mathcal{C}(k)$ , i.e., samples from the same cluster will  
 341 have equal rows of  $\mathbf{W}$  associated with them.

342 Assume that  $\mathcal{C}(i) = \mathcal{C}(k)$  and substitute them into (20):

$$\langle \tilde{w}_i - \tilde{w}_k, \mathbf{h}(z) \rangle = 0 \quad \text{for any } z \in \mathbb{S}^{d-1}. \quad (22)$$

343 However, we have just seen that the linear span of the image of  $\mathbf{h}$  is  $\mathbb{R}^d$ , which implies that  $\tilde{w}_i = \tilde{w}_k$ .  
 344 Consequently, we may abuse out notation by setting  $\tilde{w}_c = \tilde{w}_i$  if  $\mathcal{C}(i) = c$ , which yields a new form  
 345 for (20):

$$\langle \tilde{w}_a - \tilde{w}_b, \mathbf{h}(z) \rangle = \langle \mathbf{v}_a - \mathbf{v}_b, z \rangle, \quad (23)$$

346 for any  $a, b \in \mathcal{C}$  and any  $z \in \mathbb{S}^{d-1}$ .

347 **Linear transformation from  $\mathbf{v}_a - \mathbf{v}_b$  to  $\tilde{w}_a - \tilde{w}_b$ :** We now prove the existence of a linear map  
 348  $\mathcal{A}$  on  $\mathbb{R}^d$  such that  $\mathcal{A}(\mathbf{v}_a - \mathbf{v}_b) = \tilde{w}_a - \tilde{w}_b$  for any  $a, b \in \mathcal{C}$ . For this, we prove that the following  
 349 mapping is well-defined:

$$\mathcal{A} : \sum_{a,b \in \mathcal{C}} \lambda_{ab}(\mathbf{v}_a - \mathbf{v}_b) \mapsto \sum_{a,b \in \mathcal{C}} \lambda_{ab}(\tilde{w}_a - \tilde{w}_b). \quad (24)$$

350 Since the system  $\{\mathbf{v}_a - \mathbf{v}_b | a, b\}$  is not necessarily linearly independent, we have to prove that  
 351 the mapping is independent of the choice of the linear combination. More precisely if for some  
 352 coefficients  $\lambda_{ab}, \lambda'_{ab}$

$$\sum_{a,b \in \mathcal{C}} \lambda_{ab}(\mathbf{v}_a - \mathbf{v}_b) = \sum_{a,b \in \mathcal{C}} \lambda'_{ab}(\mathbf{v}_a - \mathbf{v}_b) \quad (25)$$

353 holds, then it should be implied that

$$\sum_{a,b \in \mathcal{C}} \lambda_{ab}(\tilde{w}_a - \tilde{w}_b) = \sum_{a,b \in \mathcal{C}} \lambda'_{ab}(\tilde{w}_a - \tilde{w}_b). \quad (26)$$

354 Assume that (25) holds. Then, the difference of the two sides is:

$$0 = \sum_{a,b \in \mathcal{C}} (\lambda_{ab} - \lambda'_{ab})(\mathbf{v}_a - \mathbf{v}_b). \quad (27)$$

355 Taking the scalar product with an arbitrary  $z \in \mathbb{S}^{d-1}$  and using the linearity of the scalar product  
 356 gives us:

$$0 = \langle \sum_{a,b \in \mathcal{C}} (\lambda_{ab} - \lambda'_{ab})(\mathbf{v}_a - \mathbf{v}_b), z \rangle = \sum_{a,b \in \mathcal{C}} (\lambda_{ab} - \lambda'_{ab}) \langle \mathbf{v}_a - \mathbf{v}_b, z \rangle. \quad (28)$$

357 Now using (23) yields:

$$0 = \sum_{a,b \in \mathcal{C}} (\lambda_{ab} - \lambda'_{ab}) \langle \tilde{w}_a - \tilde{w}_b, \mathbf{h}(z) \rangle = \langle \sum_{a,b \in \mathcal{C}} (\lambda_{ab} - \lambda'_{ab})(\tilde{w}_a - \tilde{w}_b), \mathbf{h}(z) \rangle. \quad (29)$$

358 However, the linear span of the image of  $\mathbf{h}$  is  $\mathbb{R}^d$ , which implies that

$$\sum_{a,b \in \mathcal{C}} (\lambda_{ab} - \lambda'_{ab})(\tilde{w}_a - \tilde{w}_b) = 0, \quad (30)$$

359 equivalent to (26). Therefore, the mapping is well-defined. The linearity of  $\mathcal{A}$  follows trivially.

360  **$\mathbf{h}$  is linear:** Equation (23) becomes:

$$\langle \mathcal{A}(\mathbf{v}_a - \mathbf{v}_b), \mathbf{h}(z) \rangle = \langle \mathbf{v}_a - \mathbf{v}_b, z \rangle, \quad (31)$$

361 for any  $a, b \in \mathcal{C}$  and any  $z \in \mathbb{S}^{d-1}$ . Nevertheless,  $\{\mathbf{v}_a - \mathbf{v}_b | a, b \in \mathcal{C}\}$  is a generator system of  $\mathbb{R}^d$ ,  
 362 and, hence, (31) is equivalent to

$$\langle \mathcal{A}\mathbf{y}, \mathbf{h}(z) \rangle = \langle \mathbf{y}, z \rangle, \quad \text{for any } \mathbf{y} \in \mathbb{R}^d \text{ and any } z \in \mathbb{S}^{d-1}. \quad (32)$$

363 This is further equivalent to

$$\langle \mathbf{y}, \mathcal{A}^\top \mathbf{h}(z) \rangle = \langle \mathbf{y}, z \rangle. \quad (33)$$

364 Since  $\mathbf{y}$  is arbitrary, we conclude that  $\mathcal{A}^\top \mathbf{h}(z) = z$  for any  $z \in \mathbb{S}^{d-1}$ . Therefore  $\mathcal{A}$  is an invertible  
 365 transformation and  $\mathbf{h} = (\mathcal{A}^\top)^{-1}$  is linear.

366 **Proving Thm. 1C case C4:** We have shown that  $\mathbf{h}$  is linear. Furthermore, from (31) it follows, by  
 367 fixing  $b$  and defining  $\psi = \mathcal{A}\mathbf{v}_b - \mathbf{w}_b$ , that

$$\tilde{\mathbf{w}}_a = \mathcal{A}\mathbf{v}_a + \psi, \quad \text{for any } a \in \mathcal{C}, \quad (34)$$

368 which proves case C4 of Thm. 1C.

369 **Proving Thm. 1C case C2:** As a special case of the previous one, now we assume that  $\mathbf{h}(z)$   
 370 is unit-normalized and maps  $\mathbb{S}^{d-1}$  to  $\mathbb{S}^{d-1}$ . That amounts to  $\mathbf{h} = (\mathcal{A}^\top)^{-1}$  being linear, norm-  
 371 preserving, and therefore orthogonal. Consequently  $\mathcal{A}$  is also orthogonal,  $\mathbf{h} = \mathcal{A}$  and (34) simplifies  
 372 to  $\frac{\beta}{\alpha}\mathbf{w}_a = \tilde{\mathbf{w}}_a = \mathcal{A}\mathbf{v}_a + \psi = \mathbf{h}(\mathbf{v}_a) + \psi$ , which proves C2 of Thm. 1C.

373 **Proving Thm. 1C case C1:** We now assume that both  $\mathbf{h}$  and  $\mathbf{w}_i$ 's are unit-normalized. Conse-  
 374 quently,  $\mathbf{h} = \mathcal{A}$  is orthogonal linear and  $\mathbf{w}_a = \frac{\alpha}{\beta}\mathcal{A}\mathbf{v}_a + \psi$ .

375 Therefore, on one hand, the  $\mathbf{w}_a$ 's lie on a  $d$ -dimensional hypersphere of radius  $\frac{\alpha}{\beta}$  and center  $\psi$ . On  
 376 the other hand, by definition,  $\mathbf{w}_a$ 's also lie on the unit hypersphere  $\mathbb{S}^{d-1}$ .

377 Since the system  $\{\mathbf{w}_a | a \in \mathcal{C}\}$  is the bijective affine linear image of the affine generator system  
 378  $\{\mathbf{v}_a | a \in \mathcal{C}\}$ ,  $\{\mathbf{w}_a | a \in \mathcal{C}\}$  is also an affine generator system (Lem. 1). Consequently, there could be  
 379 at most one hypersphere in  $\mathbb{R}^d$  which contains all the  $\mathbf{w}_a$ 's. Hence  $\frac{\alpha}{\beta} = 1$ ,  $\psi = \mathbf{0}$ , and  $\mathbf{w}_a = \mathbf{h}(\mathbf{v}_a)$ ,  
 380 which proves C1 of Thm. 1C.

381 **Proving Thm. 1C case C3:** Finally, we assume that  $\mathbf{w}_i$ 's are unit-normalized. As this is a special  
 382 case of Thm. 1C C4, we know that there exists a constant vector  $\psi$  such that:

$$\mathbf{w}_a = \frac{\alpha}{\beta}\mathcal{A}\mathbf{v}_a + \psi, \quad (35)$$

383 for any  $a \in \mathcal{C}$ . We are going to prove that  $\mathcal{O} = \frac{\alpha}{\beta}\mathcal{A}$  is orthogonal and  $\psi = \mathbf{0}$ .

384 Let  $\mathcal{O} = \mathcal{U}^\top \Sigma \mathcal{V}$  be the singular value decomposition (SVD) of  $\mathcal{O}$ . Consequently, after premultiplying  
 385 with  $\mathcal{U}$ , we receive:

$$\mathcal{U}\mathbf{w}_a = \Sigma \mathcal{V}\mathbf{v}_a + \mathcal{U}\psi. \quad (36)$$

386 As orthogonal transformations  $\mathcal{U}$  and  $\mathcal{V}$  keep their arguments unit-normalized and  $\{\mathcal{V}\mathbf{v}_a - \mathcal{V}\mathbf{v}_b\}$  is  
 387 still an affine generator system (Lem. 1), we may assume without the loss of generality that

$$\mathbf{w}_a = \Sigma \mathbf{v}_a + \psi, \quad (37)$$

388 for any  $a \in \mathcal{C}$ , where all  $\mathbf{v}_a$ 's and  $\mathbf{w}_a$ 's are unit-normalized.

389 Let us assume that  $\psi \neq \mathbf{0}$ . In that case both sides of (37) can be scaled such that the offset  $\psi$  has  
 390 unit norm. In this case  $\mathbf{w}_a$ 's are no longer on the unit hypersphere, but they instead have a mutual  
 391 norm  $r$ . Assuming that the diagonal elements of  $\Sigma$  are  $\sigma = (\sigma_1, \dots, \sigma_d)$ , this is equivalent to:

$$r^2 = \|\Sigma \mathbf{v}_a + \psi\|^2 = \|\Sigma \mathbf{v}_a\|^2 + 2\langle \Sigma \mathbf{v}_a, \psi \rangle + \|\psi\|^2 \quad (38)$$

$$= \langle \mathbf{v}_a \odot \mathbf{v}_a, \sigma \odot \sigma \rangle + \langle \mathbf{v}_a, 2\sigma \odot \psi \rangle + 1, \quad (39)$$

392 where  $[\mathbf{x} \odot \mathbf{y}]_i = x_i y_i$  is the elementwise product. Eq. (39) is equivalent to the following:

$$(\mathbf{v}_a \odot \mathbf{v}_a)^\top (\sigma \odot \sigma) + \mathbf{v}_a^\top (2\sigma \odot \psi) - r^2 = -1. \quad (40)$$

393 Collecting the equations for all  $a \in \mathcal{C}$  yields:

$$\mathcal{D} \begin{pmatrix} \sigma \odot \sigma \\ 2\sigma \odot \psi \\ r^2 \end{pmatrix} = -\mathbf{1}_{|\mathcal{C}|}, \quad (41)$$

394 where  $\mathcal{D}$  is the following  $|\mathcal{C}| \times (2d + 1)$  matrix:

$$\mathcal{D} = \begin{pmatrix} \dots\dots\dots & \dots\dots\dots & \dots \\ (\mathbf{v}_a \odot \mathbf{v}_a)^\top & \mathbf{v}_a^\top & -1 \\ \dots\dots\dots & \dots\dots\dots & \dots \end{pmatrix}. \quad (42)$$

395 By Assum. 2, the left  $|\mathcal{C}| \times 2d$  submatrix of  $\mathcal{D}$  has full rank of  $2d$ . Consequently, the solution space  
 396 to the more general, linear equation  $\mathcal{D}\mathbf{t} = -\mathbf{1}_{|\mathcal{C}|}$ , where  $\mathbf{t} \in \mathbb{R}^d$ , has a dimensionality of at most 1.

Using the unit-normality of  $\mathbf{v}_a$ 's, we see that  $(\mathbf{v}_a \odot \mathbf{v}_a)^\top \mathbf{1}_d = 1$ . From this, it follows that the solutions are exactly the following:

$$\mathbf{t} = \begin{pmatrix} \gamma \cdot \mathbf{1}_d \\ \mathbf{0}_d \\ \gamma + 1 \end{pmatrix}, \quad \text{where } \gamma \in \mathbb{R}. \quad (43)$$

Therefore, for any solution of (41) there exists  $\gamma$  such that:

$$\boldsymbol{\sigma} \odot \boldsymbol{\sigma} = \gamma \cdot \mathbf{1}_d \quad (44)$$

$$\boldsymbol{\sigma} \odot \boldsymbol{\psi} = \mathbf{0}_d. \quad (45)$$

However, as the original transformation  $\mathcal{A}$  was invertible, all singular values  $\sigma_i$  are strictly positive and, thus, it follows that  $\boldsymbol{\psi} = \mathbf{0}$ . Technically speaking, this is a contradiction to our initial assumption that  $\boldsymbol{\psi} \neq \mathbf{0}$ . All in all, it follows that  $\boldsymbol{\psi} = \mathbf{0}$  is the only possibility.

Therefore, (37) becomes:

$$\mathbf{w}_a = \Sigma \mathbf{v}_a, \quad (46)$$

where all  $\mathbf{v}_a$ 's and  $\mathbf{w}_a$ 's are unit-normalized. Following the same derivation yields:

$$1 = \|\Sigma \mathbf{v}_a\|^2 = (\mathbf{v}_a \odot \mathbf{v}_a)^\top (\boldsymbol{\sigma} \odot \boldsymbol{\sigma}), \quad (47)$$

or, after collecting the equations for all  $a \in \mathcal{C}$ :

$$\mathcal{B}(\boldsymbol{\sigma} \odot \boldsymbol{\sigma}) = \mathbf{1}_{|\mathcal{C}|}, \quad (48)$$

where  $\mathcal{B}$  is the  $|\mathcal{C}| \times d$  matrix

$$\mathcal{B} = \begin{pmatrix} \dots\dots\dots \\ (\mathbf{v}_a \odot \mathbf{v}_a)^\top \\ \dots\dots\dots \end{pmatrix}. \quad (49)$$

By Assum. 2,  $\mathcal{B}$  has full rank, thus, there is at most one solution to the equation  $\mathcal{B}\mathbf{t} = \mathbf{1}_{|\mathcal{C}|}$ . Due to the unit-normality of  $\mathbf{v}_a$ 's, this solution is exactly  $\mathbf{t} = \mathbf{1}_d$ . However, as the singular values  $\sigma_i$  are all positive, the only solution to  $\boldsymbol{\sigma} \odot \boldsymbol{\sigma} = \mathbf{1}_d$  is  $\boldsymbol{\sigma} = \mathbf{1}_d$ . This is equivalent to saying that  $\mathcal{O} = \frac{\alpha}{\beta} \mathcal{A}$  is orthogonal.

Furthermore,  $\mathbf{h} = (\mathcal{A}^\top)^{-1} = (\frac{\beta}{\alpha} \mathcal{O}^\top)^{-1} = \frac{\alpha}{\beta} \mathcal{O}$ .

□

## B Additional experimental results

In Tab. 2, we present additional ablation studies exploring the effect of varying the levels of concentration for  $\mathbf{v}_c$  across the unit hyper-sphere. We do not observe any significant impact on the  $R^2$  scores from more concentrated cluster centroids  $\mathbf{v}_c$ .

Table 2: Identifiability in the synthetic setup. Mean  $\pm$  standard deviation across 5 random seeds. Settings that match our theoretical assumptions are ✓. We report the  $R^2$  score for linear mappings,  $\tilde{\mathbf{z}} \rightarrow \mathbf{z}$  and  $\mathbf{w}_i \rightarrow \mathbf{v}_c$  for cases with normalized (o) and unnormalized (a)  $\mathbf{w}_i$ . For unnormalized  $\mathbf{w}_i$ , we verify that mappings  $\tilde{\mathbf{z}} \rightarrow \mathbf{z}$  are orthogonal by reporting the mean absolute error between their singular values and those of an orthogonal transformation.

| $N$             | $d$ | $ \mathcal{C} $ | $p(\mathbf{v}_c)$ | $p(\mathbf{z} \mathbf{v}_c)$ | M. | normalized $\mathbf{w}_i$ cases |                                             |                                         |                                   | unnormalized $\mathbf{w}_i$                 |                                         |
|-----------------|-----|-----------------|-------------------|------------------------------|----|---------------------------------|---------------------------------------------|-----------------------------------------|-----------------------------------|---------------------------------------------|-----------------------------------------|
|                 |     |                 |                   |                              |    | $R_o^2(\uparrow)$               | $\tilde{\mathbf{z}} \rightarrow \mathbf{z}$ | $\mathbf{w}_i \rightarrow \mathbf{v}_c$ | MAE <sub>o</sub> ( $\downarrow$ ) | $\tilde{\mathbf{z}} \rightarrow \mathbf{z}$ | $\mathbf{w}_i \rightarrow \mathbf{v}_c$ |
| 10 <sup>3</sup> | 5   | 100             | Uniform           | vMF( $\kappa=10$ )           | ✓  | 98.6 $\pm$ 0.01                 | 99.9 $\pm$ 0.01                             | 0.01 $\pm$ 0.00                         | 0.00 $\pm$ 0.00                   | 99.0 $\pm$ 0.00                             | 99.9 $\pm$ 0.00                         |
| 10 <sup>3</sup> | 5   | 100             | Laplace           | vMF( $\kappa=10$ )           | ✓  | 98.7 $\pm$ 0.00                 | 99.5 $\pm$ 0.00                             | 0.01 $\pm$ 0.00                         | 0.00 $\pm$ 0.00                   | 99.1 $\pm$ 0.00                             | 99.8 $\pm$ 0.00                         |
| 10 <sup>3</sup> | 5   | 100             | Normal            | vMF( $\kappa=10$ )           | ✓  | 98.2 $\pm$ 0.01                 | 99.2 $\pm$ 0.01                             | 0.01 $\pm$ 0.00                         | 0.00 $\pm$ 0.00                   | 99.2 $\pm$ 0.00                             | 99.8 $\pm$ 0.00                         |

416

417 **C Acronyms**

418 **CL** Contrastive Learning

419 **DGP** data generating process

420 **ICA** Independent Component Analysis

421 **LVM** latent variable model

422 **SSL** Self-Supervised Learning

423 **vMF** von Mises-Fisher
